# Supplementary material
Source: PubMed Central journal article supplement (PMC6830733)

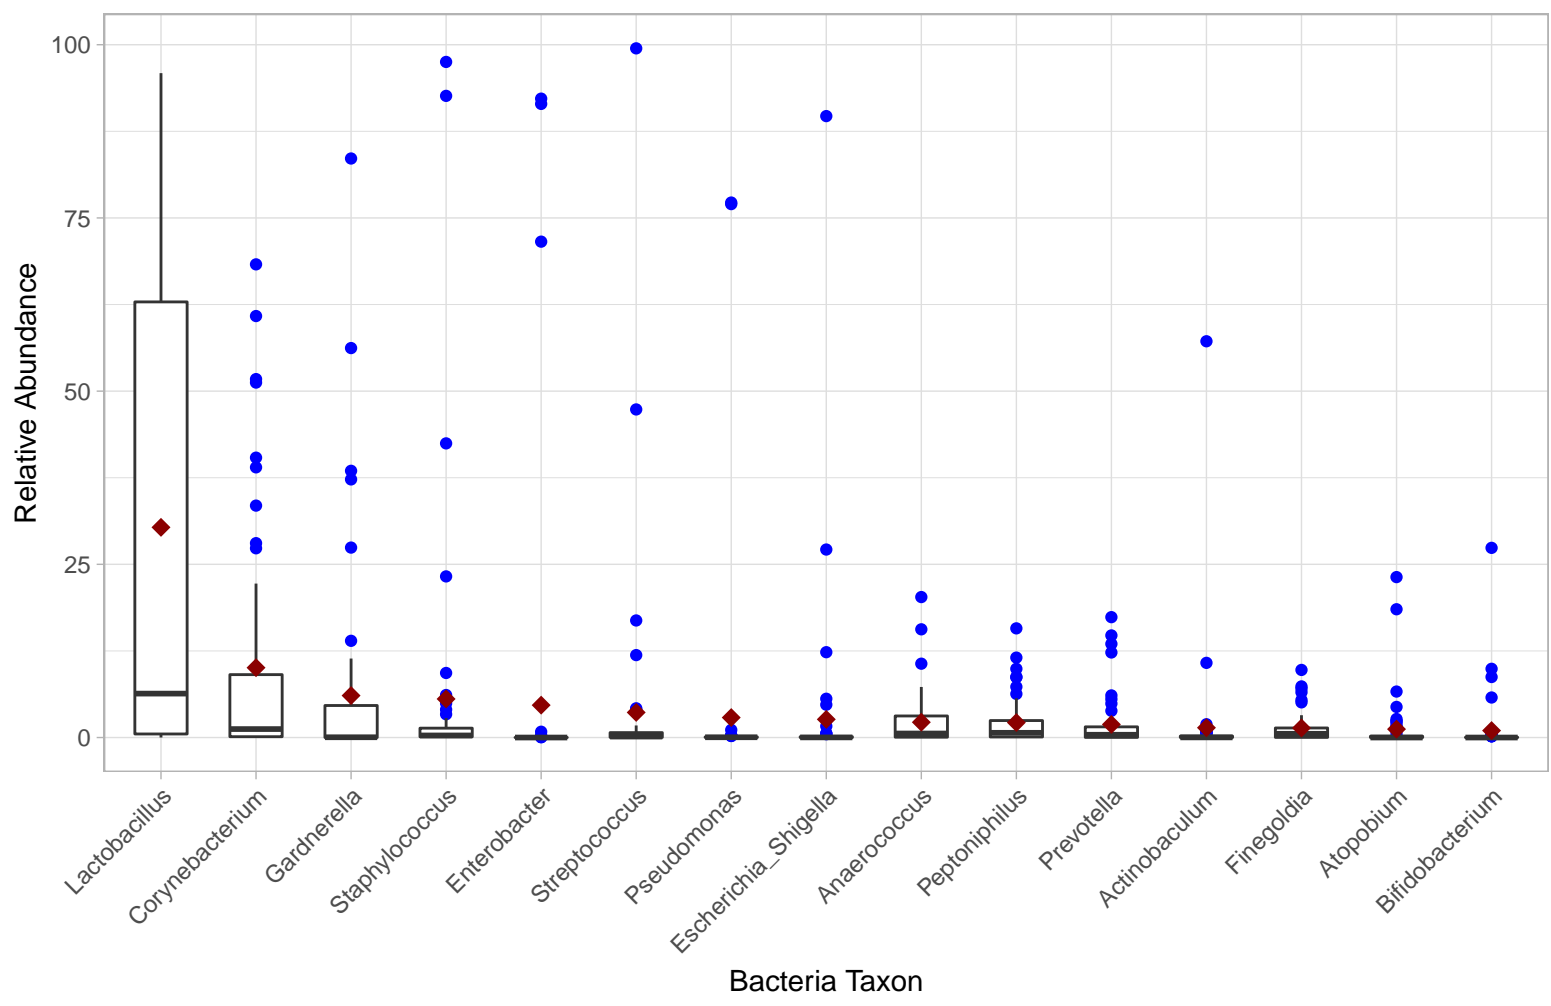

Supplement: NIHMS1506823-supplement-192_2018_3732_MOESM1_ESM.pdf [file NIHMS1506823-supplement-192_2018_3732_MOESM1_ESM.pdf]

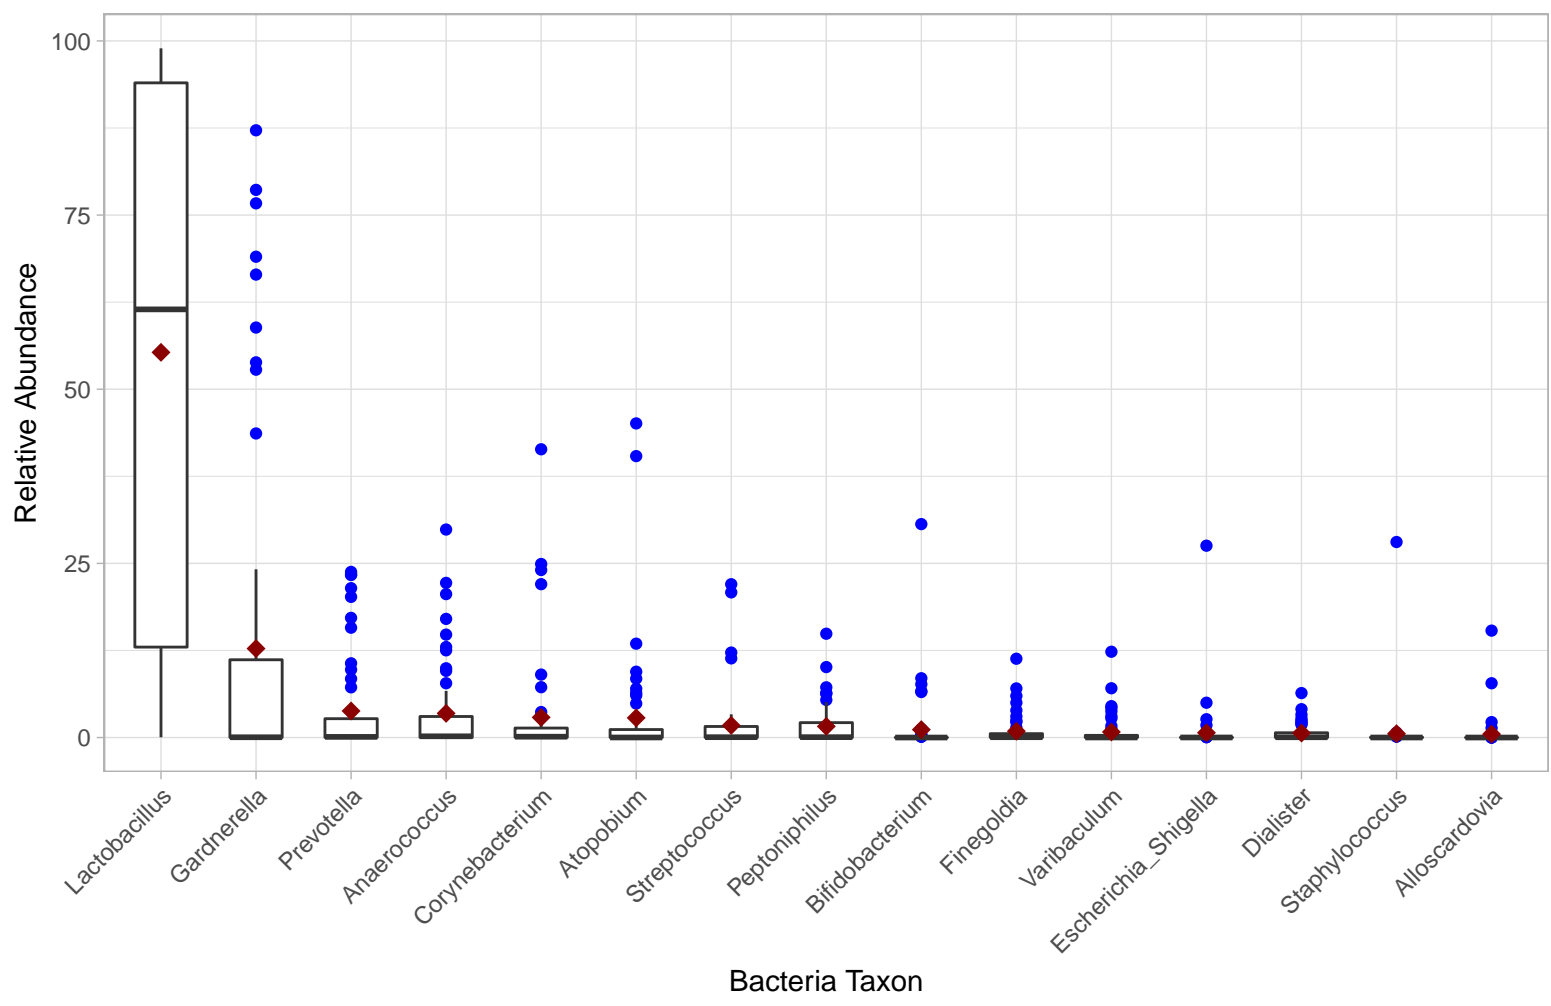

Supplement: NIHMS1506823-supplement-192_2018_3732_MOESM2_ESM.pdf [file NIHMS1506823-supplement-192_2018_3732_MOESM2_ESM.pdf]

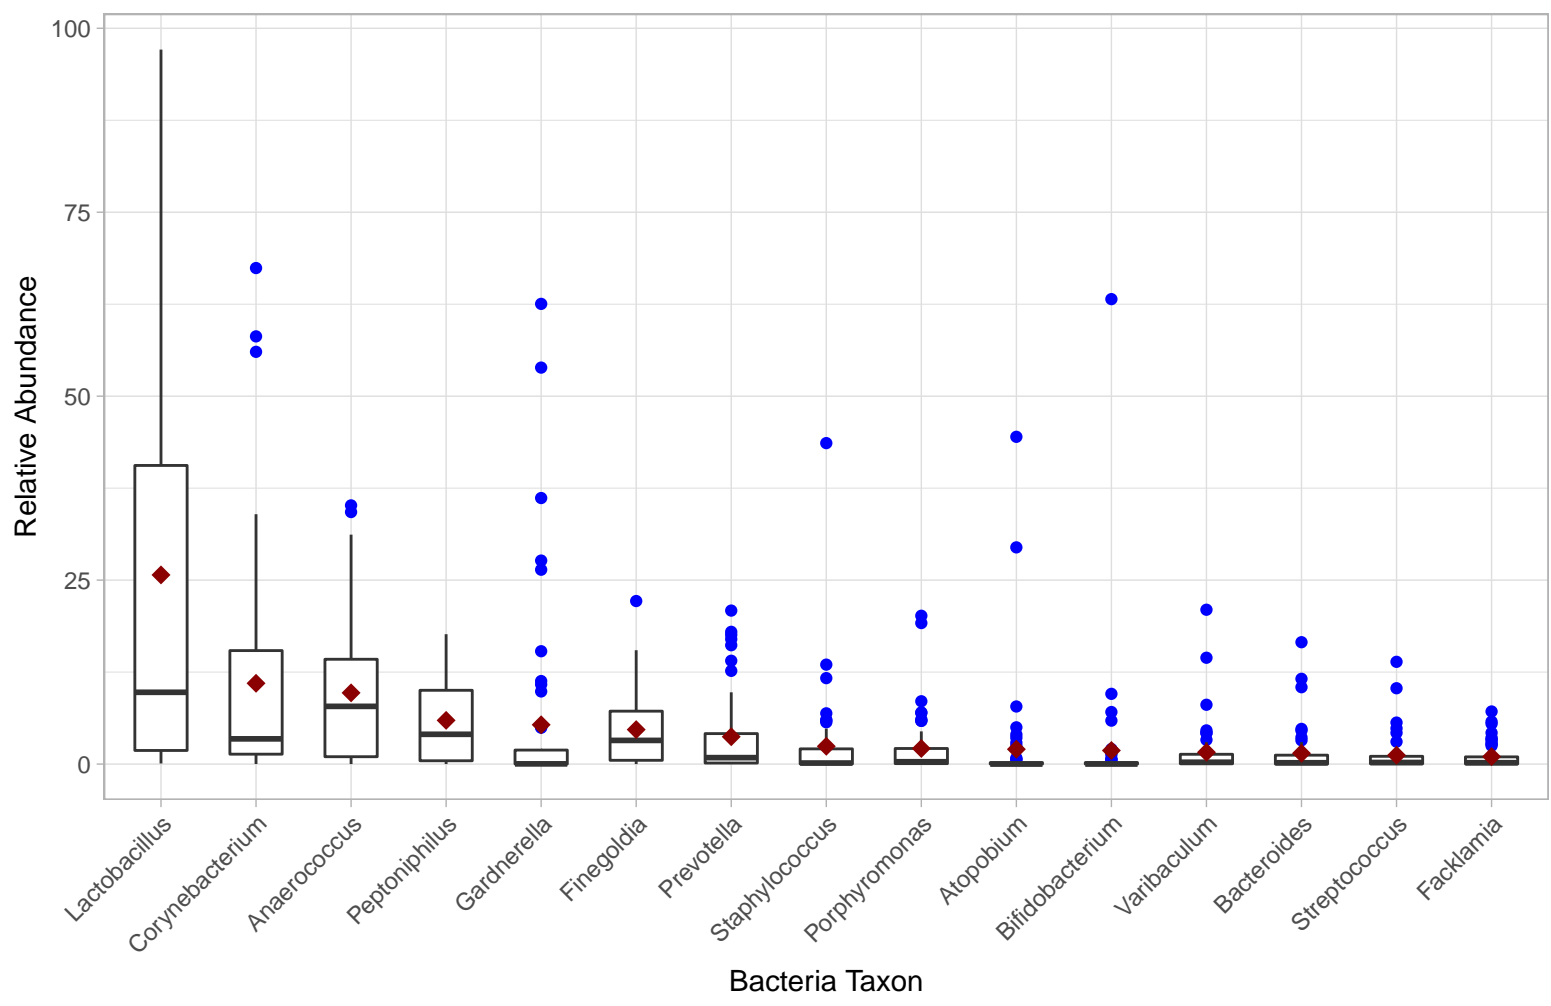

Supplement: NIHMS1506823-supplement-192_2018_3732_MOESM3_ESM.pdf [file NIHMS1506823-supplement-192_2018_3732_MOESM3_ESM.pdf]
